# Supplementary material for: A study of the electronic structure and structural stability of Gd2Ti2O7 based glass-ceramic composites
Source: Royal Society of Chemistry journal article supplement (doi:10.1039/c5ra10720b), 2015-01-01
Supplement: c5ra10720b1.pdf [file c5ra10720b1.pdf]

**Supporting Information**

**A study of the electronic structure and structural stability of  $\text{Gd}_2\text{Ti}_2\text{O}_7$  based glass-ceramic  
composites**

Esther Rani Aluri and Andrew P. Grosvenor\*

*Department of Chemistry, University of Saskatchewan, Saskatoon, SK, Canada, S7N 5C9*

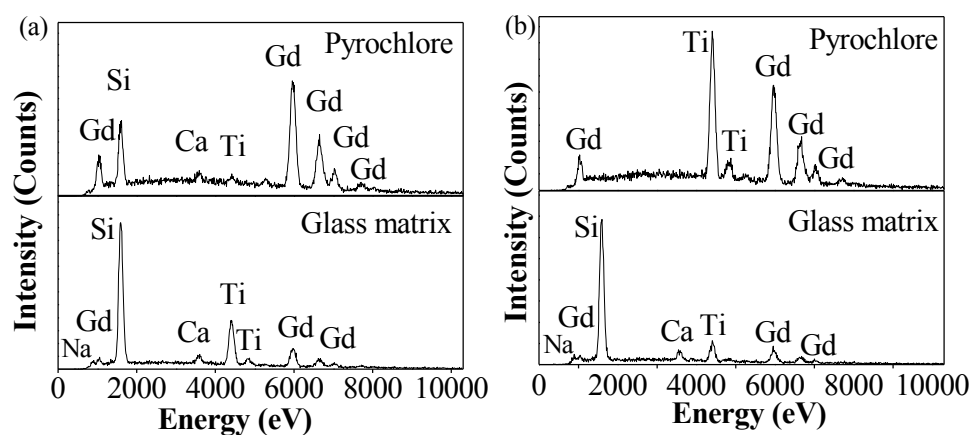

Figure S1: EDX spectra from (a) BG-Gd<sub>2</sub>Ti<sub>2</sub>O<sub>7</sub>-1100°C and (b) BG-Gd<sub>2</sub>Ti<sub>2</sub>O<sub>7</sub>-750°C containing 40 wt% loading of Gd<sub>2</sub>Ti<sub>2</sub>O<sub>7</sub> are shown.

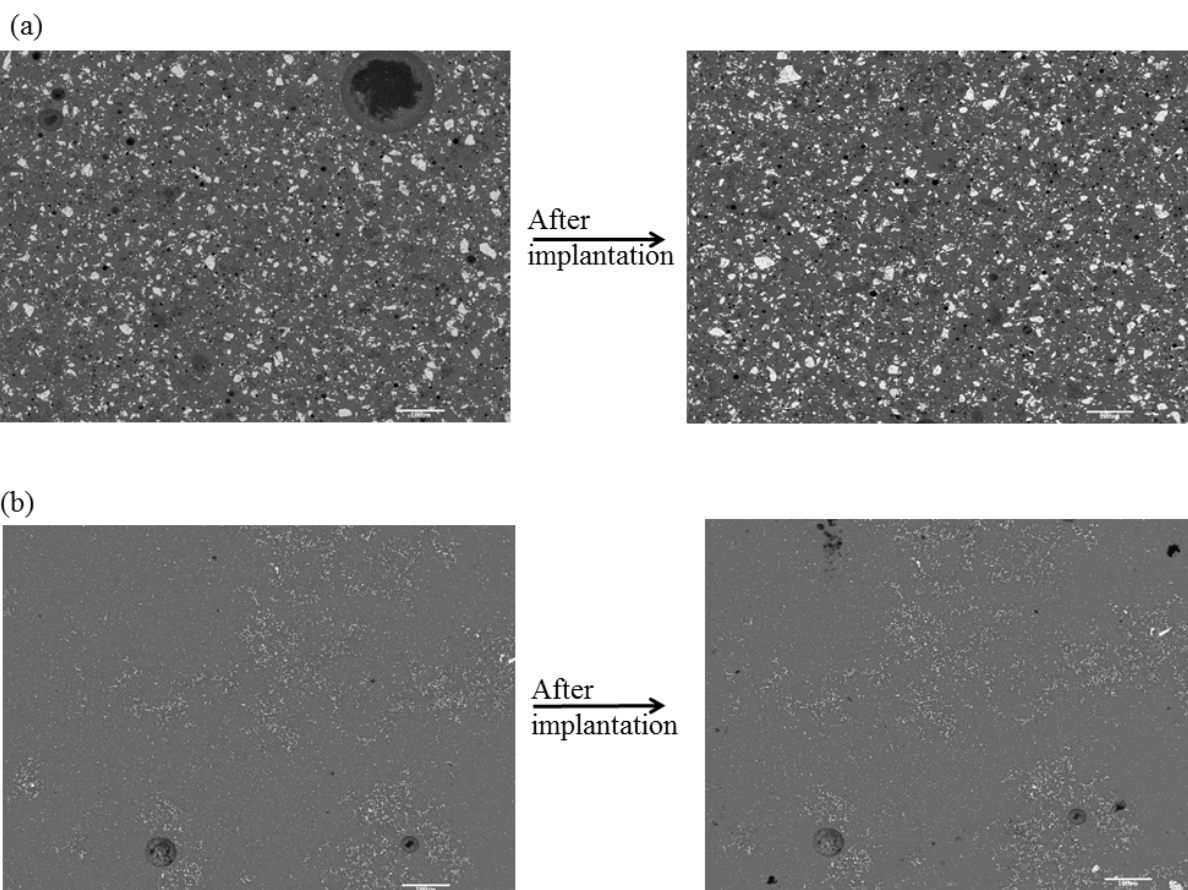

Figure S2: Backscattered electron images from the borosilicate glass composite materials (40 wt% , loading of  $\text{Gd}_2\text{Ti}_2\text{O}_7$ ) annealed at (a)  $750^\circ\text{C}$  and at (b)  $1100^\circ\text{C}$ , respectively, before (left) and after (right) ion implantation. No changes in morphology or grain size of the  $\text{Gd}_2\text{Ti}_2\text{O}_7$  crystallites (bright area) were observed as a result of ion implantation. The images were collected using a magnification of 100X and the scale bar is  $100\text{ }\mu\text{m}$ .

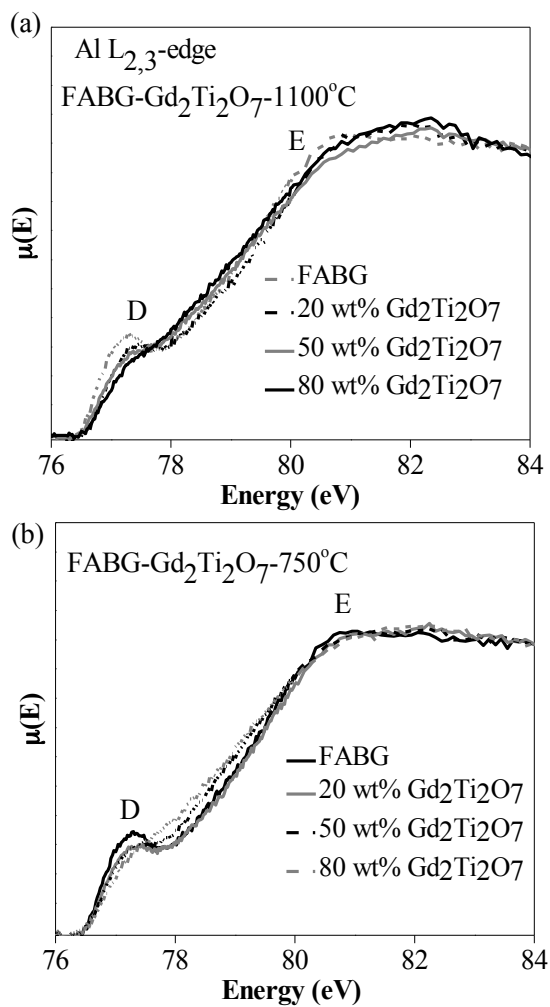

Figure S3: Al  $L_{2,3}$ -edge XANES spectra from (a) FABG-Gd<sub>2</sub>Ti<sub>2</sub>O<sub>7</sub>-1100°C and (b) FABG-Gd<sub>2</sub>Ti<sub>2</sub>O<sub>7</sub>-750°C are shown.
